# Supplementary material for: ’To be honest, I’m really scared’: perceptions and experiences of intimidation in the LMIC-based tobacco control community
Source: HighWire-hosted journal article supplement (doi:10.1136/tc-2022-057271), 2022-07-19
Supplement: tc-2022-057271supp001_data_supplement.pdf [file tc-2022-057271supp001_data_supplement.pdf]

## Supplementary file – Survey tool

### English version

#### Experience of types of intimidation in relation to tobacco control activity

*We understand intimidation very broadly as actions that make you feel frightened or threatened. It also includes unsuccessful attempts at intimidation.*

2 Have you ever experienced intimidation in relation to your tobacco control activity? (legal threats or attacks; anonymous intimidating messages; non-anonymous intimidating messages; physical intimidation or violence; theft or burglary; cyberattack)

*(Yes - No - Other)*

a If you selected Other, please specify:

b How often have you...

*(Never Rarely Sometimes Frequently All the time Prefer not to say/ I don't know)*

...experienced legal threats or attacks?

...received intimidating anonymous messages (phone calls, letters, emails, other online message)

...received intimidating non-anonymous messages (phone calls, letters, emails, other online messages)?

...experienced physical violence or intimidation (e.g., being assaulted, being followed)?

...experienced theft or burglary that you think related to your tobacco control activity?

...experienced cyberattacks?

...experienced another form/ other forms of intimidation?

i If you have experienced other form(s) of intimidation, please explain. These may include attempts to stop your work being released/published, attempts to restrict your funding, spying/surveillance, or any other.

3 Do you think other members of the tobacco control community in your country have experienced intimidation? (legal threats or attacks; anonymous intimidating messages; non-anonymous intimidating messages; physical intimidation or violence; theft or burglary; cyberattack)

*(Yes - No - Other)*

a If you selected Other, please specify:

b How often do you think they have...

*(Never Rarely Sometimes Frequently All the time Prefer not to say/ I don't know)*

...experienced legal threats or attacks?

...received intimidating anonymous messages (phone calls, letters, emails, other online message)

...received intimidating non-anonymous messages (phone calls, letters, emails, other online messages)?

...experienced physical violence or intimidation (e.g., being assaulted, being followed)?

...experienced theft or burglary that you think related to your tobacco control activity?

...experienced cyberattacks?

...experienced another form/ other forms of intimidation?

i If you think they have experienced other form(s) of intimidation, please explain. These may include attempts to stop their work being released/published, attempts to restrict their funding, spying/surveillance, or any other.

4 Have you ever experienced public discreditation in relation to your tobacco control activity? (through traditional media; through social media; through statements on websites; through open letters; through press releases; other)

(Yes - No - Other)

a If you selected Other, please specify:

b How often have you experienced...

(Never Rarely Sometimes Frequently All the time Prefer not to say/ I don't know)

...public discreditation in the traditional media (radio, television, newspaper)?

...public discreditation on social media (e.g., Twitter, Facebook)?

...another form/ other forms of public discreditation (e.g., statements on websites, open letters, press releases, other)?

i If you have experienced other form(s) of public discreditation, please explain. These may include accusations of unethical conduct, or any others.

5 Do you think other members of the tobacco control community in your country have experienced public discreditation? (through traditional media; through social media; through statements on websites; through open letters; through press releases; other)

(Yes - No - Other)

a If you selected Other, please specify:

b How often do you think they have experienced...

(Never Rarely Sometimes Frequently All the time Prefer not to say/ I don't know)

...public discreditation in the traditional media (radio, television, newspaper)?

...public discreditation on social media (e.g., Twitter, Facebook)?

...another form/ other forms of public discreditation (e.g., statements on websites, open letters, press releases, other)?

i If you think they have experienced other form(s) of public discreditation, please explain. These may include accusations of unethical conduct, or any others.

6 If you or other members of the tobacco control community in your country experienced public discreditation or received intimidating messages (phone call/letters/emails/online messages), what (if any) arguments were used against you? What did they accuse you of doing?

7 Do you or other members of the tobacco control community in your country not engage in certain tobacco control activities or not say certain things publicly because you fear consequences?

(Yes - No - Other)

a If you selected Other, please specify:

b Please explain more (e.g., what activities are affected, what consequences do you fear and by whom, is it because it happened to others).

### Who is behind the intimidation?

8 How sure are you that the tobacco industry is behind the intimidation you had in mind when answering the previous questions? Please go through the list and indicate how certain you are who is behind the types of intimidation. If you are not aware of instances of a type of intimidation, please skip the row.

(Not at all sure Very unsure Quite unsure Quite sure Very sure There is no doubt. I have evidence. Prefer not to say/don't know)

Legal threats or attacks

Intimidating anonymous messages

Intimidating non-anonymous messages

Physical violence/intimidation

Theft/ burglary

Cyberattacks

Public discreditation (traditional media)

Public discreditation (social media)

Public discreditation (other)

Other form(s) of intimidation, including public discreditation (described by you)

a If you selected other form(s) of intimidation, please explain.

9 Please explain what makes you unsure or sure? Please specify to which example you are referring.

10 If you have evidence, what evidence is it?

11 Do you experience difficulties obtaining evidence and if so, why?

### Additional questions on intimidation

Any details you provide are very valuable, but you have the option to skip optional questions if you prefer. Please make sure you fill in the demographic information on the last page and submit your response - otherwise, your valuable data will be lost. Thank you!

12 Do you think intimidation has changed over time?

(Yes - No - Other)

a If you selected Other, please specify:

b Is it now more intense or weaker than previously?

(More intense - Weaker - The same - Other)

I If you selected Other, please specify:

c Have the forms of intimidation changed over time?

(Yes - No - Other)

i If you selected Other, please specify:

d Please comment on how and why intimidation has (not) changed over time.

13 Is there awareness in the tobacco control community that intimidation is a problem?

a Please explain.

14 Is intimidation a taboo topic in the tobacco control community in your country?

a Please explain.

15 Why do you think members of the tobacco control community experience intimidation?

### Responding to intimidation

16 How have you or other members of the tobacco control community responded to intimidation?  
(Please explain with examples if possible)

17 Do you think the response has worked well?

a Please explain.

### Impact of intimidation

Impacts could include experiencing feelings of insecurity, losing funding, your work not being released, altering outputs, disruption/delay of your work, or any other.

18 Do you think intimidation impacts on you and your tobacco control work?

(Yes - No - Other)

a If you selected Other, please specify:

19 Do you think intimidation impacts on the work of other members of the tobacco control community in your country?

(Yes - No - Other)

a If you selected Other, please specify:

20 If you can, please share some more details on how intimidation impacts you, your work, and the tobacco control community in your country?

21 Are you aware of cases where people stopped working in tobacco control due to experiences of intimidation?

(Yes - No - Other)

a If you selected Other, please specify:

b Please explain. You don't need to mention names. If you mention a name, we will anonymise it in the research outputs.

### How to handle intimidation better

22 What do you and the tobacco control community need to handle intimidation better? Is there any support you have or would like to have?

### Additional comments

23 Do you wish to add any further examples or thoughts on the topic?

### Demographic information

24. How would you describe your gender?

*(Female Male Other Prefer not to say)*

a If you selected Other, please specify:

25. How old are you?

*(Under 20 20-29 30-39 40-49 50-59 60-69 Over 70 Prefer not to say)*

26 In which WHO region do you live?

*(African Region Easter Mediterranean Region European Region Region of the Americas South-East Asian Region Western Pacific Region)*

a In which country do you live? If you prefer not to answer the question, you can put “Prefer not to say”

27 In which WHO region do you do (most of) your tobacco control work?

*(African Region Easter Mediterranean Region European Region Region of the Americas South-East Asian Region Western Pacific Region)*

a In which country do you do (most of) your tobacco control work? If you prefer not to answer the question, you can put “Prefer not to say”

28 How would you describe your role?

*(Advocate Researcher Politician Civil Servant Other Prefer not to say)*

a If you selected Other, please specify:

29. How long have you been active in tobacco control?

*(Less than 2 years 2-5 years 6-9 years 10-20 years more than 20 years Prefer not to say)*

## French version

### Expérience des types d'intimidation en rapport avec l'activité de prévention du tabagisme

*Nous employons le terme d'intimidation pour désigner au sens large les actions qui vous effraient ou vous font ressentir une menace. Cela comprend également les tentatives échouées d'intimidation.*

2 Avez-vous déjà été victime d'intimidation en rapport avec vos activités de prévention du tabagisme ? (Menaces ou attaques légales ; messages d'intimidation anonymes ; messages d'intimidation non-anonymes ; intimidation ou violence physique ; vol ou cambriolage ; cyberattaque)

*(Oui Non Autre)*

a Si vous avez sélectionné Autre, veuillez préciser:

b À quelle fréquence avez-vous...

*(Jamais Rarement Parfois Régulièrement Tout le temps Je préfère ne pas l'indiquer/je ne sais pas)*

...reçu des attaques ou menaces légales ?

...reçu des messages d'intimidation anonymes (appels téléphoniques, lettres, e-mails, autres messages en ligne) ?

...reçu des messages d'intimidation non-anonymes (appels téléphoniques, lettres, e-mails, autres messages en ligne) ?

...rencontré des tentatives d'intimidation ou des violences physiques (ex. : agression, se faire suivre dans la rue) ?

...subi un vol ou un cambriolage lié selon vous à vos activités de prévention du tabagisme ?

...été la cible de cyberattaques ?

...rencontré une autre ou autres formes d'intimidation ?

i Si vous avez rencontré d'autres formes d'intimidation, veuillez préciser. Cela peut être des tentatives d'empêchement de publication ou de divulgation de votre travail, des tentatives pour restreindre votre financement, de l'espionnage ou de la surveillance ou toute autre forme.

3 Pensez-vous que d'autres membres de la communauté anti-tabac de votre pays ont été victime d'intimidation ? (Menaces ou attaques légales ; messages d'intimidation anonymes ; messages d'intimidation non-anonymes ; intimidation ou violence physique ; vol ou cambriolage ; cyberattaque)

(Oui Non Autre)

a Si vous avez sélectionné Autre, veuillez préciser:

b À quelle fréquence pensez-vous qu'ils ont...

(Jamais Rarement Parfois Régulièrement Tout le temps Je préfère ne pas l'indiquer/je ne sais pas)

...reçu des attaques ou menaces légales ?

...reçu des messages d'intimidation anonymes (appels téléphoniques, lettres, e-mails, autres messages en ligne) ?

...reçu des messages d'intimidation non-anonymes (appels téléphoniques, lettres, e-mails, autres messages en ligne) ?

...rencontré des tentatives d'intimidation ou des violences physiques (ex. : agression, se faire suivre dans la rue) ?

...subi un vol ou un cambriolage lié selon vous à vos activités de prévention du tabagisme ?

...été la cible de cyberattaques ?

...rencontré une autre ou autres formes d'intimidation ?

i Si vous pensez qu'ils ont rencontré d'autres formes d'intimidation, veuillez préciser. Cela peut être des tentatives d'empêchement de publication ou de divulgation de leur travail, des tentatives pour restreindre leur financement, de l'espionnage ou de la surveillance ou toute autre forme.

4 Avez-vous déjà été victime de stigmatisation publique lié à vos activités de prévention du tabagisme ? (Via des médias traditionnels ; via les réseaux sociaux ; via des publications sur des sites ; via des lettres ouvertes ; via des communiqués de presse ; autre)

(Oui Non Autre)

a Si vous avez sélectionné Autre, veuillez préciser:

b À quelle fréquence avez-vous fait l'expérience...

*(Jamais Rarement Parfois Régulièrement Tout le temps Je préfère ne pas l'indiquer/je ne sais pas)*

...d'une stigmatisation publique dans les médias traditionnels (radio, télévision, journaux) ?

...d'une stigmatisation publique sur les réseaux sociaux (ex. : Twitter, Facebook) ?

...d'autres formes de stigmatisation publique (ex. : publications sur des sites, lettres ouvertes, communiqués de presse, autres) ?

i Si vous avez rencontré d'autres formes de stigmatisation publique, veuillez préciser. Cela peut être des accusations de conduite non éthique, ou toute autre forme.

5 Pensez-vous que les membres de la communauté anti-tabac de votre pays ont été victime de stigmatisation publique ? (Via des médias traditionnels ; via les réseaux sociaux ; via des publications sur des sites ; via des lettres ouvertes ; via des communiqués de presse ; autre)

*(Oui Non Autre)*

a Si vous avez sélectionné Autre, veuillez préciser:

b À quelle fréquence pensez-vous qu'ils ont fait l'expérience...

*(Jamais Rarement Parfois Régulièrement Tout le temps Je préfère ne pas l'indiquer/je ne sais pas)*

...d'une stigmatisation publique dans les médias traditionnels (radio, télévision, journaux) ?

...d'une stigmatisation publique sur les réseaux sociaux (ex. : Twitter, Facebook) ?

...d'autres formes de stigmatisation publique (ex. : publications sur des sites, lettres ouvertes, communiqués de presse, autres) ?

i Si vous pensez qu'ils ont rencontré d'autres formes de stigmatisation publique, veuillez préciser. Cela peut être des accusations de conduite non éthique, ou toute autre forme.

6 Si vous ou d'autres membres de la communauté anti-tabac dans votre pays avez fait l'expérience d'une stigmatisation publique ou reçu des messages d'intimidation (appels téléphoniques/e-mails/messages en ligne), quels arguments ont été utilisés contre vous, le cas échéant ? De quoi vous a-t-on accusé(e) ?

7 Avez-vous, vous ou d'autres membres de la communauté anti-tabac de votre pays, déjà évité de vous livrer à certaines activités anti-tabac ou de dire certaines choses en public par peur des conséquences ?

*(Oui Non Autre)*

a Si vous avez sélectionné Autre, veuillez préciser:

b Veuillez préciser (ex. : quelles activités furent affectées, de quelles conséquences vous aviez peur et de la part de qui, si c'était parce que cela était arrivé à d'autres).

### Qui était à l'origine de l'intimidation ?

8 À quel point êtes-vous sûr(e) que l'industrie du tabac était derrière l'intimidation à laquelle vous pensiez en répondant à la question précédente ? Veuillez parcourir la liste et indiquer votre niveau de

certitude concernant l'identité des auteurs de chaque type d'intimidation. Si vous n'avez pas connaissance d'un certain type d'intimidation, veuillez passer à la ligne suivante.

*(Pas sûr du tout Très peu sûr Peu sûr Assez sûr Très sûr J'en suis certain(e). J'ai des preuves. Je préfère ne pas l'indiquer/je ne sais pas)*

Attaques ou menaces légales

Messages d'intimidation anonymes

Messages d'intimidation non-anonymes

Violence/intimidation physique

Vol/cambriolage

Cyberattaques

Stigmatisation publique (médias traditionnels)

Stigmatisation publique (réseaux sociaux)

Stigmatisation publique (autre)

Autre(s) forme(s) d'intimidation, y compris la stigmatisation publique (décrite par vous)

a Si vous avez sélectionné d'autres formes d'intimidation, veuillez préciser.

9 Pouvez-vous expliquer ce qui vous rend sûr(e) ou vous fait douter. Veuillez préciser l'exemple auquel vous faites référence.

10 Si vous avez des preuves, de quelle nature sont-elles ?

11 Trouvez-vous difficile d'obtenir des preuves et si oui, pourquoi ?

### Questions supplémentaires sur l'intimidation

Toute information fournie s'avère précieuse, mais vous avez la possibilité de passer les questions facultatives si vous le préférez. Veuillez vous assurer de remplir les informations démographiques sur la dernière page et d'envoyer votre réponse, car autrement vos données seront perdues. Merci !

12 Pensez-vous que l'intimidation a changé au cours du temps ?

*(Oui Non Autre)*

a Si vous avez sélectionné Autre, veuillez préciser:

b Est-elle plus intense ou moindre par rapport au passé ?

*(Plus intense Moindre Identique Autre)*

i Si vous avez sélectionné Autre, veuillez préciser:

c Les formes d'intimidation ont-elles changé au cours du temps ?

*(Oui Non Autre)*

i Si vous avez sélectionné Autre, veuillez préciser:

d Veuillez décrire comment et pourquoi l'intimidation a changé (ou non) au cours du temps.

13 A-t-on conscience que l'intimidation est un problème au sein de la communauté anti-tabac ?



a Veuillez expliquer votre réponse.

14 L'intimidation est-elle un sujet tabou dans la communauté anti-tabac de votre pays ?

a Veuillez expliquer votre réponse.

15 Pourquoi pensez-vous que les membres de la communauté anti-tabac sont victimes d'intimidation ?

### Répondre à l'intimidation

16 Avez-vous, vous ou d'autres membres de la communauté anti-tabac, répondu à des tentatives d'intimidation ? Veuillez fournir des exemples si possible.

17 Pensez-vous que la réponse a eu l'effet désiré ?

a Veuillez expliquer votre réponse.

### Les effets de l'intimidation

Les effets peuvent inclure un sentiment d'insécurité, une perte de financement, la non-publication de vos recherches, des résultats modifiés, une interruption ou un retard dans votre travail, ou autre chose.

18 Pensez-vous que l'intimidation a des effets sur vous et votre travail de prévention du tabagisme ?

*(Oui Non Autre)*

a Si vous avez sélectionné Autre, veuillez préciser:

19 Pensez-vous que l'intimidation affecte le travail d'autres membres de la communauté anti-tabac de votre pays ?

*(Oui Non Autre)*

a Si vous avez sélectionné Autre, veuillez préciser:

20 Si possible, veuillez préciser de quelle manière l'intimidation affecte votre personne, votre travail et la communauté anti-tabac de votre pays.

21 Connaissez-vous des cas de personnes ayant cessé de travailler dans la prévention du tabagisme parce qu'elles avaient été intimidées ?

*(Oui Non Autre)*

a Si vous avez sélectionné Autre, veuillez préciser:

b Veuillez expliquer votre réponse. Il n'est pas nécessaire de donner des noms. Si vous mentionnez un nom, nous le rendrons anonyme dans les résultats de recherche.

### Comment mieux gérer l'intimidation

22 Que faudrait-il à la communauté anti-tabac et à vous-même pour mieux gérer l'intimidation ? Y a-t-il une forme d'assistance que vous avez ou que vous souhaiteriez avoir ?

### Commentaires additionnels

23 Avez-vous d'autres exemples à ajouter sur le sujet ?

### Informations démographiques

24. Comment décririez-vous votre genre ?

*(Femme Homme Autre Préfère ne pas l'indiquer)*

a Si vous avez sélectionné Autre, veuillez préciser:

25. Quel âge avez-vous ?

*(Moins de 20 ans 20-29 ans 30-39 ans 40-49 ans 50-59 ans 60-69 ans Plus de 70 ans Préfère ne pas l'indiquer)*

26 Dans quelle région OMS vivez-vous ?

*(Afrique Méditerranée orientale Europe Amériques Asie du Sud-Est Pacifique occidentale)*

a Dans quel pays vivez-vous ? Si vous préférez ne pas répondre à cette question, veuillez écrire « préfère ne pas l'indiquer ».

27 Dans quelle région OMS faites-vous la majorité de votre travail de prévention du tabagisme ?

*(Afrique Méditerranée orientale Europe Amériques Asie du Sud-Est Pacifique occidentale)*

a Dans quel pays faites-vous la majorité de votre travail de prévention du tabagisme ? Si vous préférez ne pas répondre à cette question, veuillez écrire « préfère ne pas l'indiquer ».

28 Comment définiriez-vous votre poste ?

*(Porte-parole Chercheur Politicien Fonctionnaire Autre Préfère ne pas l'indiquer)*

a Si vous avez sélectionné Autre, veuillez préciser:

29. Depuis combien de temps êtes-vous actif/ active dans la lutte antitabac ?

*(Moins de 2 ans 2-5 ans 6-9 ans 10-20 ans Plus de 20 ans Préfère ne pas l'indiquer)*

## Spanish version

### Experiencias de distintos tipos de intimidación debidos a la actividad relacionada con el Control del Tabaco

*Atribuimos una acepción amplia a la intimidación; dicha acepción abarca acciones que llevan a que uno se sienta atemorizado/a o amenazado/a. También se extiende a los intentos de intimidación que no desembocan en ella.*

2 ¿Ha experimentado en alguna ocasión intimidación por su actividad relacionada con el Control del Tabaco? (por ej. amenazas o ataques legales; mensajes intimidantes anónimos; mensajes intimidantes no anónimos; intimidación física o violencia; hurto o robo; ataques cibernéticos)

*(Sí - No - Otro)*

a Si ha seleccionado otro, especifique aquí por favor:

b ¿Con cuánta frecuencia...

*(Nunca Rara vez A veces Con frecuencia Siempre Prefiero no decirlo/no lo sé)*

... ha sido amenazado/a o atacado/a legalmente?

... ha recibido mensajes anónimos intimidantes? (Por teléfono, por carta, por correo electrónico u otros mensajes en línea)

... ha recibido mensajes intimidantes no anónimos? (Por teléfono, por carta, por correo electrónico u otros mensajes en línea)

... ha sufrido violencia o intimidación física? (por ej. asalto o persecución)

... ha experimentado robo o hurto que, según su opinión, fue debido a su actividad en el Control del Tabaco?

...ha experimentado ataques cibernéticos?

...ha experimentado otra(s) forma(s) de intimidación?

i Si ha experimentado otra(s) forma(s) de intimidación, por favor especifíquela(s). Estas pueden incluir intentos de impedir que se publicara su trabajo, intentos de restringir sus fondos, espionaje/vigilancia, o cualquier otro intento de este tipo.

3 ¿Cree que otros miembros de la comunidad del Control del Tabaco en su país han experimentado intimidación? (por ej. amenazas o ataques legales; mensajes intimidantes anónimos; mensajes intimidantes no anónimos; intimidación física o violencia; hurto o robo; ataques cibernéticos)

(Sí - No - Otro)

a Si ha seleccionado otro, especifique aquí por favor:

b ¿Con cuánta frecuencia cree que...

(Nunca Rara vez A veces Con frecuencia Siempre Prefiero no decirlo/no lo sé)

...son amenazados o atacados legalmente?

... reciben mensajes anónimos intimidantes? (Por teléfono, por carta, por correo electrónico u otros mensajes en línea)

... reciben mensajes intimidantes no anónimos? (Por teléfono, por carta, por correo electrónico u otros mensajes en línea)

... sufren violencia o intimidación física? (por ej. asalto o persecución)

...experimentan robo o hurto que, según su opinión, fue debido a su actividad en el Control del Tabaco?

... experimentan ataques cibernéticos?

...experimentan otra(s) forma(s) de intimidación?

i Si cree que otros miembros de la comunidad del Control del Tabaco en su país han experimentado otra(s) forma(s) de intimidación, por favor especifíquelas. Estas pueden incluir intentos de impedir que se publicara su trabajo, intentos de restringir sus fondos, espionaje/vigilancia, o cualquier otro intento de este tipo.

4 ¿Ha sido víctima de desprestigio público a causa de su actividad relacionada con el control del tabaco? (Por medios tradicionales; en redes sociales; en declaraciones en línea; en cartas abiertas; en comunicados de prensa u otros medios)

(Sí - No - Otro)

a Si ha seleccionado otro, especifique aquí por favor:

b ¿Con cuánta frecuencia ha...

(Nunca Rara vez A veces Con frecuencia Siempre Prefiero no decirlo/no lo sé)

...sido víctima de desprestigio público por medios tradicionales? (Por la radio, por televisión, en la prensa)

... sido víctima de desprestigio público en las redes sociales? (Por ej. en Twitter o Facebook)

...sido desprestigiado/a de otra manera? (Por ej. en declaraciones en línea, en cartas abiertas, en comunicados de prensa u otros medios)

i Si ha experimentado otra(s) forma(s) de desprestigio público, por favor, especifíquelas aquí. Estas pueden incluir haber sido acusado/a de una conducta no ética.

5 Según su opinión ¿son víctimas de desprestigio público otros miembros de la comunidad del Control del Tabaco en su país? (Por medios tradicionales; en redes sociales; en declaraciones en línea; en cartas abiertas; en comunicados de prensa u otros medios)

(Sí - No - Otro)

a Si ha seleccionado otro, especifique aquí por favor:

b ¿Con cuánta frecuencia cree que...

(Nunca Rara vez A veces Con frecuencia Siempre Prefiero no decirlo/no lo sé)

...experimentan desprestigio público por medios tradicionales? (Por la radio, por televisión, en la prensa)

...experimentan desprestigio público en las redes sociales? (Por ej. en Twitter o Facebook)

...son desprestigiados de otra manera? (Por ej. en declaraciones en línea, en cartas abiertas, en comunicados de prensa u otros medios)

i Si cree que otros miembros de la comunidad del Control del Tabaco en su país han experimentado otra(s) forma(s) de desprestigio público, por favor, especifíquelas aquí. Estas pueden incluir que se les haya acusado de una conducta no ética.

6 Si usted u otros miembros de la comunidad del Control del Tabaco en su país ha(n) tenido experiencias de desprestigio público o ha(n) recibido mensajes intimidantes (por teléfono/en cartas/en correos electrónicos/en mensajes online), ¿qué se dijo en contra de usted? ¿De qué le/la acusaron?

7 Usted u otros miembros de la comunidad del Control del Tabaco ¿se abstiene(n) de decir ciertas cosas o elige(n) no llevar a cabo ciertas actividades relacionadas con el Control del Tabaco por temer las repercusiones?

(Sí - No - Otro)

a Si ha seleccionado otro, especifique aquí por favor:

b Por favor, explique su respuesta: ¿cuáles son las actividades afectadas?; ¿cuáles son las repercusiones que teme, y de parte de quién?; ¿siente temor por haber visto lo que les ha pasado a otras personas?

### ¿Quién está detrás de la intimidación?

8 ¿Cuán seguro/a está de que la industria tabaquera está detrás de los tipos de intimidación nombrados en la primera pregunta? Repase la lista e indique cuán seguro/a está de quién está detrás de la intimidación. Si no es consciente de casos de alguno de los tipos de intimidación nombrados, por favor, sáltese esa casilla.

*(No estoy para nada seguro/a Estoy poco seguro/a No estoy muy seguro/a Estoy bastante seguro/a Estoy muy seguro/a No cabe duda. Tengo evidencia que lo demuestra. Prefiero no decirlo/no lo sé)*

Amenazas o ataques legales

Mensajes intimidantes anónimos

Mensajes intimidantes no anónimos

Violencia o intimidación física

Robo/hurto

Ataques cibernéticos

Desprestigio público (por medios tradicionales)

Desprestigio público (en redes sociales)

Desprestigio público (de otro tipo)

Otra(s) forma(s) de intimidación, incluyendo el desprestigio público (descrito por usted)

a Si ha seleccionado otra(s) forma(s) de intimidación, por favor, especifíquelas aquí:

9 Por favor, explique por qué (no) está seguro/a. Especifique el ejemplo al que se refiere.

10 En el caso de que tenga evidencia, ¿qué evidencia tiene?

11 ¿Le resulta difícil obtener evidencia? Si es así, ¿por qué?

### Preguntas adicionales sobre la intimidación

Cualquier información que nos pueda dar es muy útil, sin embargo, tiene la opción de saltarse las preguntas optativas si prefiere. Por favor, asegúrese de rellenar la información demográfica en la última página y de entregar su respuesta. Si no, perderemos la información útil que nos ha proporcionado. ¡Muchas gracias!

12 ¿Cree que la intimidación ha cambiado a lo largo del tiempo?

*(Sí - No - Otro)*

a Si ha seleccionado otro, especifique aquí por favor:

b ¿Es más o menos intensa que antes?

*(Más intensa – Menos intense – Igualmente intensa – Otro)*

i. Si ha seleccionado otro, especifique aquí por favor:

c. ¿Han cambiado las formas de intimidación a lo largo del tiempo?

*(Sí - No - Otro)*

i Si ha seleccionado otro, especifique aquí por favor:

d Explique cómo y por qué ha cambiado la intimidación (o no) a lo largo del tiempo.

13 ¿Los miembros de la comunidad del Control del Tabaco son conscientes de que la intimidación es un problema?

a Explíquelo por favor.

14 ¿La intimidación es un tema tabú en la comunidad del Control del Tabaco en su país?

a Explíquelo por favor.

15 ¿Por qué cree que los miembros de la comunidad del Control del Tabaco experimentan la intimidación?

### Respuestas a la intimidación

16 ¿Cómo ha(n) respondido usted u otros miembros de la comunidad del Control del Tabaco a la intimidación? Dé ejemplos, si es posible.

17 ¿Cree que la(s) respuesta(s) le(s) ha servido bien?

a Explíquelo por favor.

### El impacto de la intimidación

El impacto que tiene la intimidación podría incluir sentirse inseguro/a, perder fondos, que no se publique su trabajo, cambiar los resultados de su trabajo, que su trabajo se vea interrumpido o retrasado, o cualquier otro ejemplo de este tipo

18 ¿Cree que la intimidación tiene un impacto negativo sobre usted y su trabajo relacionado con el Control del Tabaco?

(Sí - No - Otro)

a Si ha seleccionado otro, especifique aquí por favor:

19 ¿Cree que la intimidación tiene un impacto negativo sobre el trabajo de otros miembros de la comunidad del Control del Tabaco en su país?

(Sí - No - Otro)

a Si ha seleccionado otro, especifique aquí por favor:

20 Si puede, por favor explique más sobre cómo le afecta la intimidación; cómo afecta su trabajo, y cómo afecta a la comunidad del Control del Tabaco en su país.

21 ¿Conoce casos de gente que dejó de trabajar en el campo del Control del Tabaco por haber tenido experiencias intimidantes?

(Sí - No - Otro)

a Si ha seleccionado otro, especifique aquí por favor:

b Por favor, explique su respuesta. No tiene que divulgar ningún nombre. Si decide mencionar un nombre, haremos anónimo este dato en los resultados de la investigación.

### Cómo afrontar mejor la intimidación

22 ¿Qué necesitan usted y la comunidad del Control del Tabaco para poder afrontar mejor la intimidación? ¿Disponen de apoyo de algún tipo? ¿Les gustaría tener más apoyo, y de qué tipo?

### Comentarios adicionales

23 ¿Desea dar más ejemplos, o compartir algo más sobre el tema?

### Información demográfica

24. ¿Cómo describiría su propio género?

*(Mujer Hombre Otro Prefiero no decirlo)*

a Si ha seleccionado otro, especifique aquí por favor:

25. ¿Cuántos años tiene?

*(Menos de 20 De 20 a 29 De 30 a 39 De 40 a 49 De 50 a 59 De 60 a 69 Más de 70 Prefiero no decirlo)*

26 ¿En qué región de la OMS vive?

*(Región de África Región del Mediterráneo oriental Región de Europa Región de las Américas Región de Asia Sudoriental Región del Pacífico occidental)*

a ¿En qué país vive? Si prefiere no contestar esta pregunta, ponga “prefiero no decirlo”.

27 ¿En qué región de la OMS lleva a cabo la mayoría de su trabajo relacionado con el Control del Tabaco?

*(Región de África Región del Mediterráneo oriental Región de Europa Región de las Américas Región de Asia Sudoriental Región del Pacífico occidental)*

a ¿En qué país lleva a cabo la mayoría de su trabajo relacionado con el Control del Tabaco? Si prefiere no contestar esta pregunta, ponga “prefiero no decirlo”.

28 ¿Cómo describiría su rol?

*(Defensor/a Investigador/a Político/a Funcionario/a Otro Prefiero no decirlo)*

a. Si ha seleccionado otro, especifique aquí por favor:

29. ¿Cuánto tiempo lleva activo/a en el campo del Control de Tabaco?

*(Menos de 2 años De 2-5 años De 6-9 años De 10-20 años Más de 20 años Prefiero no decirlo)*
