# Supplementary material for: ’To be honest, I’m really scared’: perceptions and experiences of intimidation in the LMIC-based tobacco control community
Source: PubMed Central journal article supplement — Tob Control. 2022 Jul 19;33(1):38–44. doi: 10.1136/tc-2022-057271 (PMC10803975; doi:10.1136/tc-2022-057271), 2022-07-19
Supplement: tc-2022-057271supp002.pdf [file tc-2022-057271supp002.pdf]

**SUPPLEMENTARY FILE** (Graphs and table in the order appearing in the text)**Graph 1:**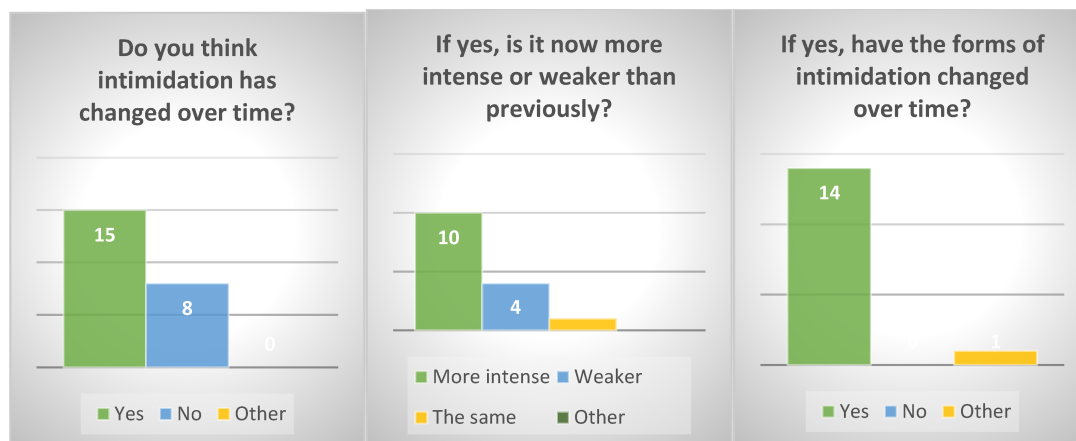

Graph 1: Results – Changes in intimidation over time

**Supplementary Table 1:**

| How sure are you the tobacco industry is behind each form of intimidation? |                                          |                                                       |                                            |                                                         |                                                |
|----------------------------------------------------------------------------|------------------------------------------|-------------------------------------------------------|--------------------------------------------|---------------------------------------------------------|------------------------------------------------|
|                                                                            | There is no doubt/ very sure/ quite sure |                                                       | Quite unsure/ very unsure/ not sure at all |                                                         | Number of participants answering the question* |
| <b>Public discreditation – social media</b>                                | 13/21 (62%)                              | There is no doubt: 3<br>Very sure: 4<br>Quite sure: 6 | 8/21 (38%)                                 | Quite unsure: 3<br>Very unsure: 1<br>Not sure at all: 4 | 21 out of 23                                   |
| <b>Public discreditation – traditional media</b>                           | 10/19 (53%)                              | There is no doubt: 3<br>Very sure: 4<br>Quite sure: 3 | 9/19 (47%)                                 | Quite unsure: 3<br>Very unsure: 1<br>Not sure at all: 5 | 19 out of 23                                   |
| <b>Legal threats or attacks</b>                                            | 10/19 (53%)                              | There is no doubt: 3<br>Very sure: 4<br>Quite sure: 3 | 9/19 (47%)                                 | Quite unsure: 5<br>Very unsure: 1<br>Not sure at all: 3 | 19 out of 23                                   |
| <b>Public discreditation – other (statements on website)</b>               | 10/20 (50%)                              | There is no doubt: 2<br>Very sure: 5<br>Quite sure: 3 | 10/20 (50%)                                | Quite unsure: 3<br>Very unsure: 3<br>Not sure at all: 4 | 20 out of 23                                   |
| <b>Non-anonymous intimidating messages</b>                                 | 9/20 (45%)                               | There is no doubt: 1<br>Very sure: 3<br>Quite sure: 5 | 11/20 (55%)                                | Quite unsure: 4<br>Very unsure: 4<br>Not sure at all: 3 | 20 out of 23                                   |
| <b>Anonymous intimidating messages</b>                                     | 7/18 (39%)                               | There is no doubt: 0<br>Very sure: 3<br>Quite sure: 4 | 11/18 (61%)                                | Quite unsure: 4<br>Very unsure: 3<br>Not sure at all: 4 | 18 out of 23                                   |
| <b>Cyberattacks</b>                                                        | 4/16 (25%)                               | There is no doubt: 1<br>Very sure: 2<br>Quite sure: 1 | 12/16 (75%)                                | Quite unsure: 4<br>Very unsure: 1<br>Not sure at all: 7 | 16 out of 23                                   |
| <b>Theft/Burglary</b>                                                      | 3/14 (21%)                               | There is no doubt: 0<br>Very sure: 1<br>Quite sure: 2 | 11/14 (79%)                                | Quite unsure: 2<br>Very unsure: 1<br>Not sure at all: 8 | 14 out of 23                                   |
| <b>Physical violence/intimidation</b>                                      | 3/15 (20%)                               | There is no doubt: 0<br>Very sure: 1<br>Quite sure: 2 | 12/15 (80%)                                | Quite unsure: 3<br>Very unsure: 2<br>Not sure at all: 7 | 15 out of 23                                   |

Table 1: Results – Who is behind intimidation? (no. of participants/ no. of participants answering the question) (\*participants were asked to only complete rows for which they knew examples)

Graph 2:

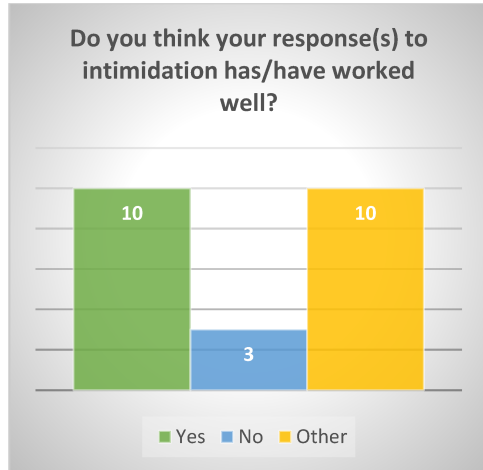

Graph 2: Results – Do you think your response(s) to intimidation has/have worked well?
